# Supplementary material
Source: PubMed Central journal article supplement (PMC4116185)
Supplement: ac5017425_si_001.pdf [file ac5017425_si_001.pdf]

Supporting Information for  
**In Vivo Analytical Performance of Nitric Oxide-Releasing Glucose Biosensors**

*Robert J. Soto,<sup>†</sup> Benjamin J. Privett,<sup>‡</sup> and Mark H. Schoenfish<sup>\*,†</sup>*

<sup>†</sup>Department of Chemistry, University of North Carolina at Chapel Hill, CB 3290, Chapel Hill,  
NC 27599

<sup>‡</sup>Novan Therapeutics, 4222 Emperor Blvd. Suite 200, Durham, NC 27703

\*To whom correspondence should be addressed: schoenfish@unc.edu

**Content**

- I. Supporting Experimental Details
  1. Fabrication and benchtop performance of NO-releasing glucose biosensors.
  2. In vivo protocol for biosensor implantation and operation.
- II. Supporting Figures
  1. Nitric oxide release profiles (fluxes) from polyurethane coatings.
  2. Amperometric response of NO-releasing glucose biosensor.
  3. Distribution of in vivo biosensor run-in times.
  4. Representative Clarke error grid analysis.
  5. Representative SEMs of working electrode surface post-explantation.
- III. Supporting Tables
  1. In vitro sensor analytical merits.
  2. Nitric oxide-releasing silica nanoparticle characterization.

## **Fabrication and Benchtop Evaluation of NO-Releasing Glucose Sensors**

Bare sensors were first cleaned by sonication in EtOH. Electropolymerization of phenol onto the working electrode was carried out via chronocoulometry (+900 mV vs. Ag/AgCl, 15 min) in a stirred solution of deoxygenated PBS buffer containing 40 mM phenol. The total charge passed was measured to be  $-1.64 \pm 0.18 \times 10^{-3} \text{ C cm}^{-2}$ . Following electrodeposition of the inner-most polyphenol layer, sensors were sterilized in CIDEX PLUS® 28 Day Solution per the manufacturer's instructions and rinsed with sterile water. All subsequent fabrication steps were carried out in a sterile laminar flow hood. Glucose oxidase was immobilized on the sensing surface by encapsulating the GOx in a methyltrimethoxysilane (MTMOS) xerogel membrane. A GOx-containing sol was prepared by mixing 50  $\mu\text{L}$  120 mg  $\text{mL}^{-1}$  GOx in  $\text{H}_2\text{O}$  with 125  $\mu\text{L}$  20% v/v MTMOS in EtOH. The addition of water to the alcohol/silane mixture initiates the co-condensation of the silane monomers to form a polymerized silica xerogel that effectively entraps GOx. Sensors were dip-coated 15 times (5-s still time with 10-s drying periods) into the resulting sol and allowed to dry for 30 min. Following deposition of the selectivity and enzyme membranes, sensors were coated with a PU diffusion-limiting/NO-releasing layer similar to steel wire substrates by dip-coating into a particle-containing PU solution. A TPU topcoat was then applied as an additional layer. Control sensors were coated using PU solutions containing MAP3 or MPTMS nanoparticles (72 and 48 mg  $\text{mL}^{-1}$ , respectively) that were not functionalized with *N*-diazoniumdiolate or *S*-nitrosothiol NO donors. Sensors were stored in individual sterile centrifuge tubes in a vacuum-sealed bag and kept at  $-20^\circ\text{C}$  until use.

Biosensor performance was evaluated via chronoamperometry at  $37^\circ\text{C}$  in PBS buffer under conditions of air saturation using a CH Instruments 1030A potentiostat (Austin, TX). Sensors were pre-conditioned by soaking in PBS for 3–4 h prior to testing, and polarized at +600

mV vs. Ag/AgCl in PBS for 20 min to hydrate the sensor membranes and achieve a stable background current, respectively. Calibration curves were generated by stepwise increasing the buffer glucose concentration in 3 mM increments (up to 30 mM) under stirred conditions. Sensor response time was determined as the time required to reach 95% of the steady-state current ( $t_{95}$ ) in response to 5.6 mM glucose under stirred conditions. Amperometric selectivity coefficients for glucose over potential endogenous interfering species (e.g., acetaminophen, ascorbate) were calculated using the equation below, where  $\Delta I_{\text{Glu}}$  and  $\Delta I_j$  represent the measured current response to step increases in glucose ( $c_{\text{glu}}=5.6$  mM) and the interferent ( $c_j=100$   $\mu\text{M}$ ) concentration, respectively.

$$\log K_{\text{glu},j}^{\text{amp}} = \log \left( \frac{\Delta I_j / c_j}{\Delta I_{\text{glu}} / c_{\text{glu}}} \right)$$

## **In Vivo Protocol for Biosensor Implantation and Operation**

The animal protocol used in this study was approved by the IACUC at Synchrony, LLC (Durham, NC). The in vivo performance of glucose biosensors was evaluated in Yorkshire-type piglets (n=10; Palmetto Research Swine; Reevesville, SC) weighing approximately 7–15 kg. Pigs were anesthetized using Telazol (2–6 mg kg<sup>-1</sup> intramuscular) and maintained on isoflurane (2–3% v/v balance O<sub>2</sub>) during sensor implantation. The dorsal skin was prepared by clipping of the hair and alternating iodine and alcohol scrubs, each in triplicate. Six sensors (three NO-releasing, three control) were implanted in pairs (one NO-releasing, one control) spaced ~3 cm by cannulation into the subcutaneous space using a sterile 22-gauge needle. Sensors were positioned approximately 4 cm lateral and perpendicular to the spine and 12–30 cm caudal to the scapulae. Dermabond<sup>TM</sup> was used to secure the sensor at the entry wound. The sensors were further secured using Prolene 3-0 sutures, gauze, and Opsite®. Sensor pairs were connected to battery-operated wireless bipotentiostats (model 8100 K-5, Pinnacle Technology, Inc.; Lawrence, KS) to allow free motion of the animal while applying a constant +600 mV (vs. Ag/AgCl) to the working electrode. The bipotentiostats transmitted current measurements wirelessly via an integrated RF transmitter to a nearby receiver. Data was collected in real time using Sirenia acquisition software (Pinnacle Technology, Inc.; Lawrence, KS).

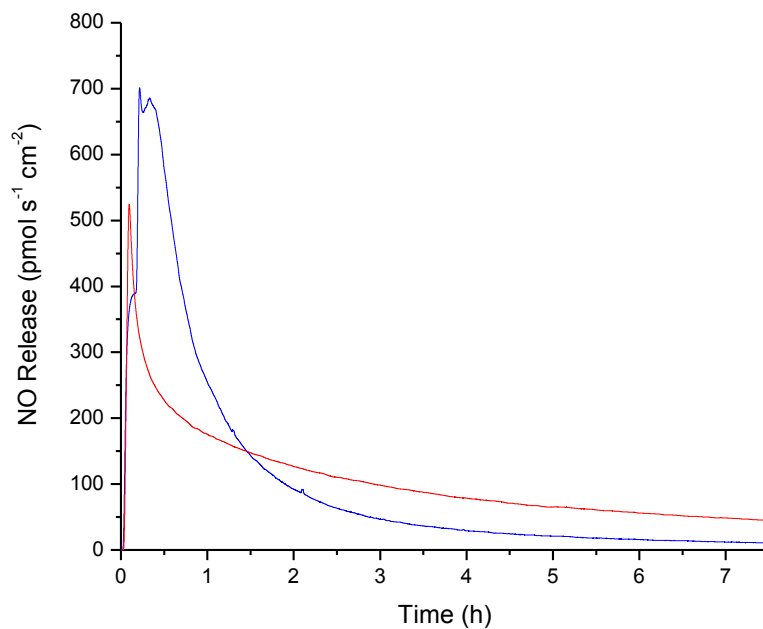

**Figure S1.** Nitric oxide release from MPTMS-RSNO (red) and MAP3/NO (blue) coatings. For MPTMS-RSNO coatings, NO measurements were performed in a light-shielded flask and in the presence of DTPA.

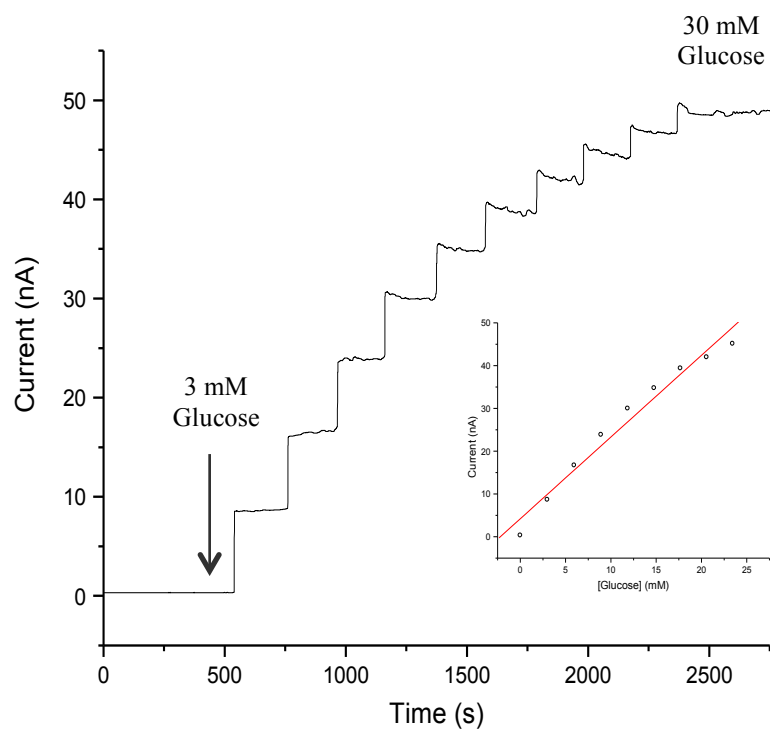

**Figure S2.** Amperometric response for NO-releasing PU-coated needle type glucose sensor after pre-conditioning in PBS. Inset represents a typical calibration curve after PU membrane hydration.

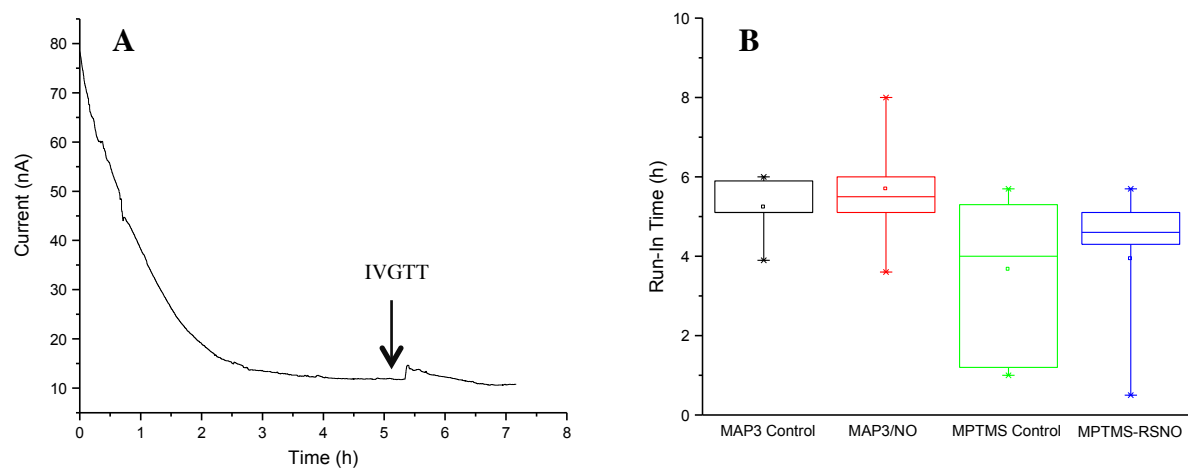

**Figure S3.** (A) Representative current trace for glucose biosensor following implantation and (B) distribution of estimated run-in times for NO-releasing and control sensors. Error bars indicate the total spread of data and boxes represent data points that lie in the center quartiles (25–75%).

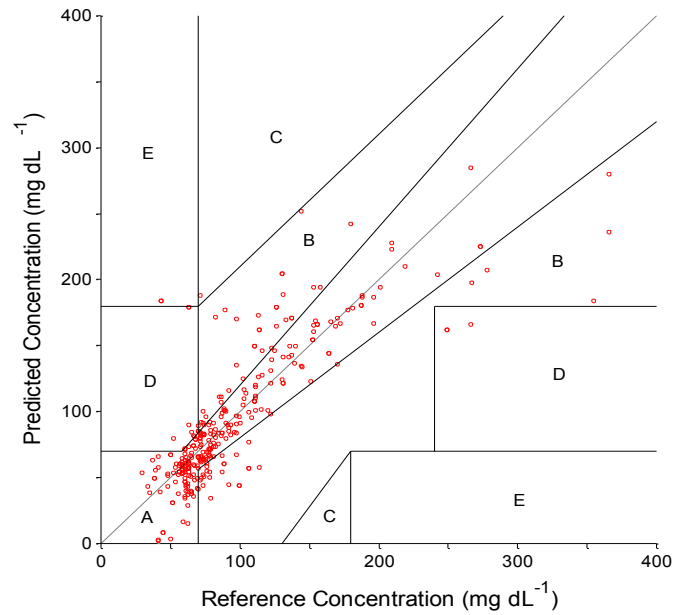

**Figure S4.** Clarke error grid for MPTMS-RSNO biosensors on day 0. While daily IVGTT provided excursions into the hyperglycemic range, the majority of glucose determinations ( $\sim 70\%$ ) were made in the 50–100 mg dL<sup>-1</sup> range. Zones labeled A and B represent clinically acceptable blood glucose measurements, while zones C, D, and E represent erroneous and progressively worse determinations.



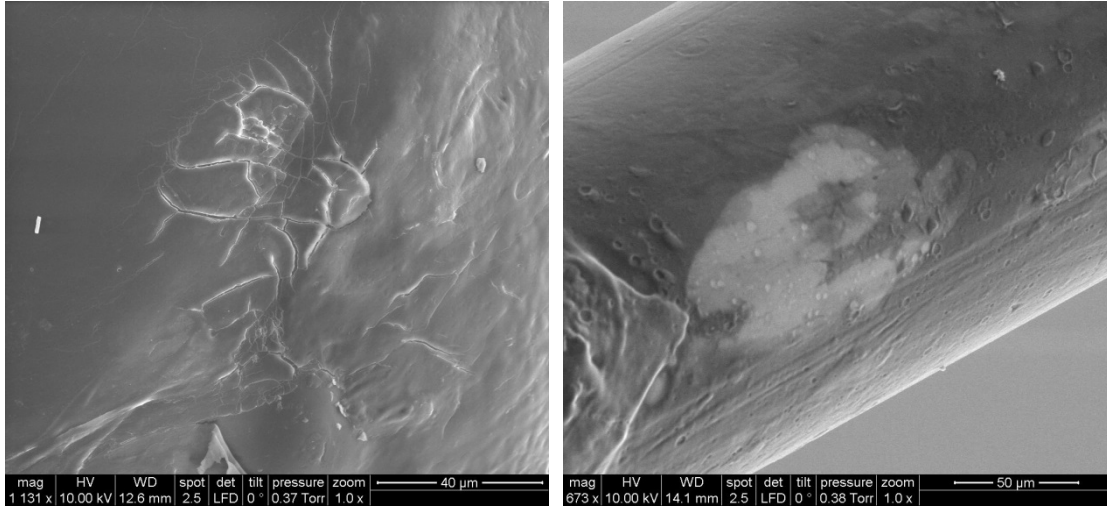

**Figure S5.** Representative post-explantation scanning electron micrographs of glucose biosensor working electrode surfaces exhibiting (A) membrane cracking and (B) partial coating delamination.

**Table S1.** Summary of in vitro sensor analytical merits

| Performance Merit                  | Day <sup>a</sup> | MAP3 Control | MAP3/NO | MPTMS Control | MPTMS-RSNO |
|------------------------------------|------------------|--------------|---------|---------------|------------|
| Sensitivity (nA mM <sup>-1</sup> ) | 0                | 2.3±0.2      | 2.3±0.1 | 2.1±0.4       | 2.2±0.7    |
|                                    | 1                | 2.2±1.0      | 2.4±1.8 | 2.7±0.1       | 2.1±0.9    |
|                                    | 3                | 1.3±0.3      | 1.5±1.3 | 2.2±1.0       | 2.0±1.4    |
|                                    | 7                | 1.6±0.1      | 1.8±1.1 | 2.0±0.5       | 1.8±0.3    |
|                                    | 10               | 1.4±1.0      | 1.9±1.5 | 1.3±0.3       | 1.4±0.8    |
| Response Time (s)                  | 0                | 28±18        | 13±9    | 36±12         | 40±27      |

<sup>a</sup>Sensitivity of NO-releasing and control glucose biosensors was evaluated after incubation in PBS at 37 °C

**Table S2.** Nanoparticle NO Donor Characterization

| Nanoparticle NO Donor | [NO] <sub>T</sub> (μmol mg <sup>-1</sup> ) | Particle Diameter (nm) <sup>a</sup> |
|-----------------------|--------------------------------------------|-------------------------------------|
| MAP3                  | 2.03±0.20                                  | 820±70                              |
| MPTMS                 | 3.36±0.62                                  | 620±80                              |

<sup>a</sup>Nanoparticle diameter estimated via scanning electron microscopy
